# Supplementary material
Source: PubMed Central journal article supplement (PMC2719940)
Supplement: JCI37760sd.pdf [file JCI37760sd.pdf]

## Supplemental Figure S1

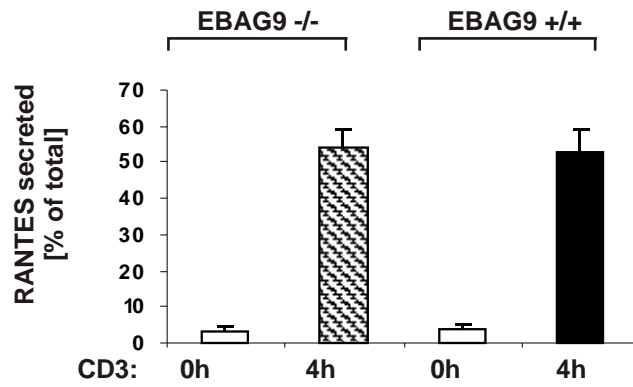

**Figure S1. RANTES release from CTLs is unaltered in EBAG9<sup>-/-</sup> mice**

CTLs were derived by MLR. Release of RANTES was triggered by TCR ligation with anti-CD3 mAb for 4 h and analyzed by ELISA (R&D Systems). Bars shown means  $\pm$  S.D. of three independent experiments performed in triplicates.

## Supplemental Figure S2

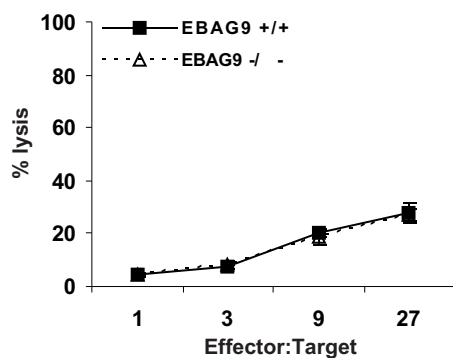

### Figure S2. Enhanced allogeneic cytotoxicity of EBAG9<sup>-/-</sup> CTLs relies on the granule-mediated killing pathway

CTLs obtained from MLR were pretreated for 2h with 0.5  $\mu$ M Concanamycin A (CMA; Alexis Biochemicals) and 5  $\mu$ M Granzyme B inhibitor Z-AAD-CMK (Alexis Biochemicals) to block perforin/granzyme-mediated killing. Subsequently cytolytic activity of CTLs in the presence of CMA and Z-AAD-CMK against allogeneic P815 target cells was determined using Cytotox 96 nonradioactive kit (Promega) according to the manufacturer's instructions and as described in *Methods*, respectively. Data are means  $\pm$  S.D. of quadruplicates. One representative example of two experiments is shown.

## Supplemental Figure S3

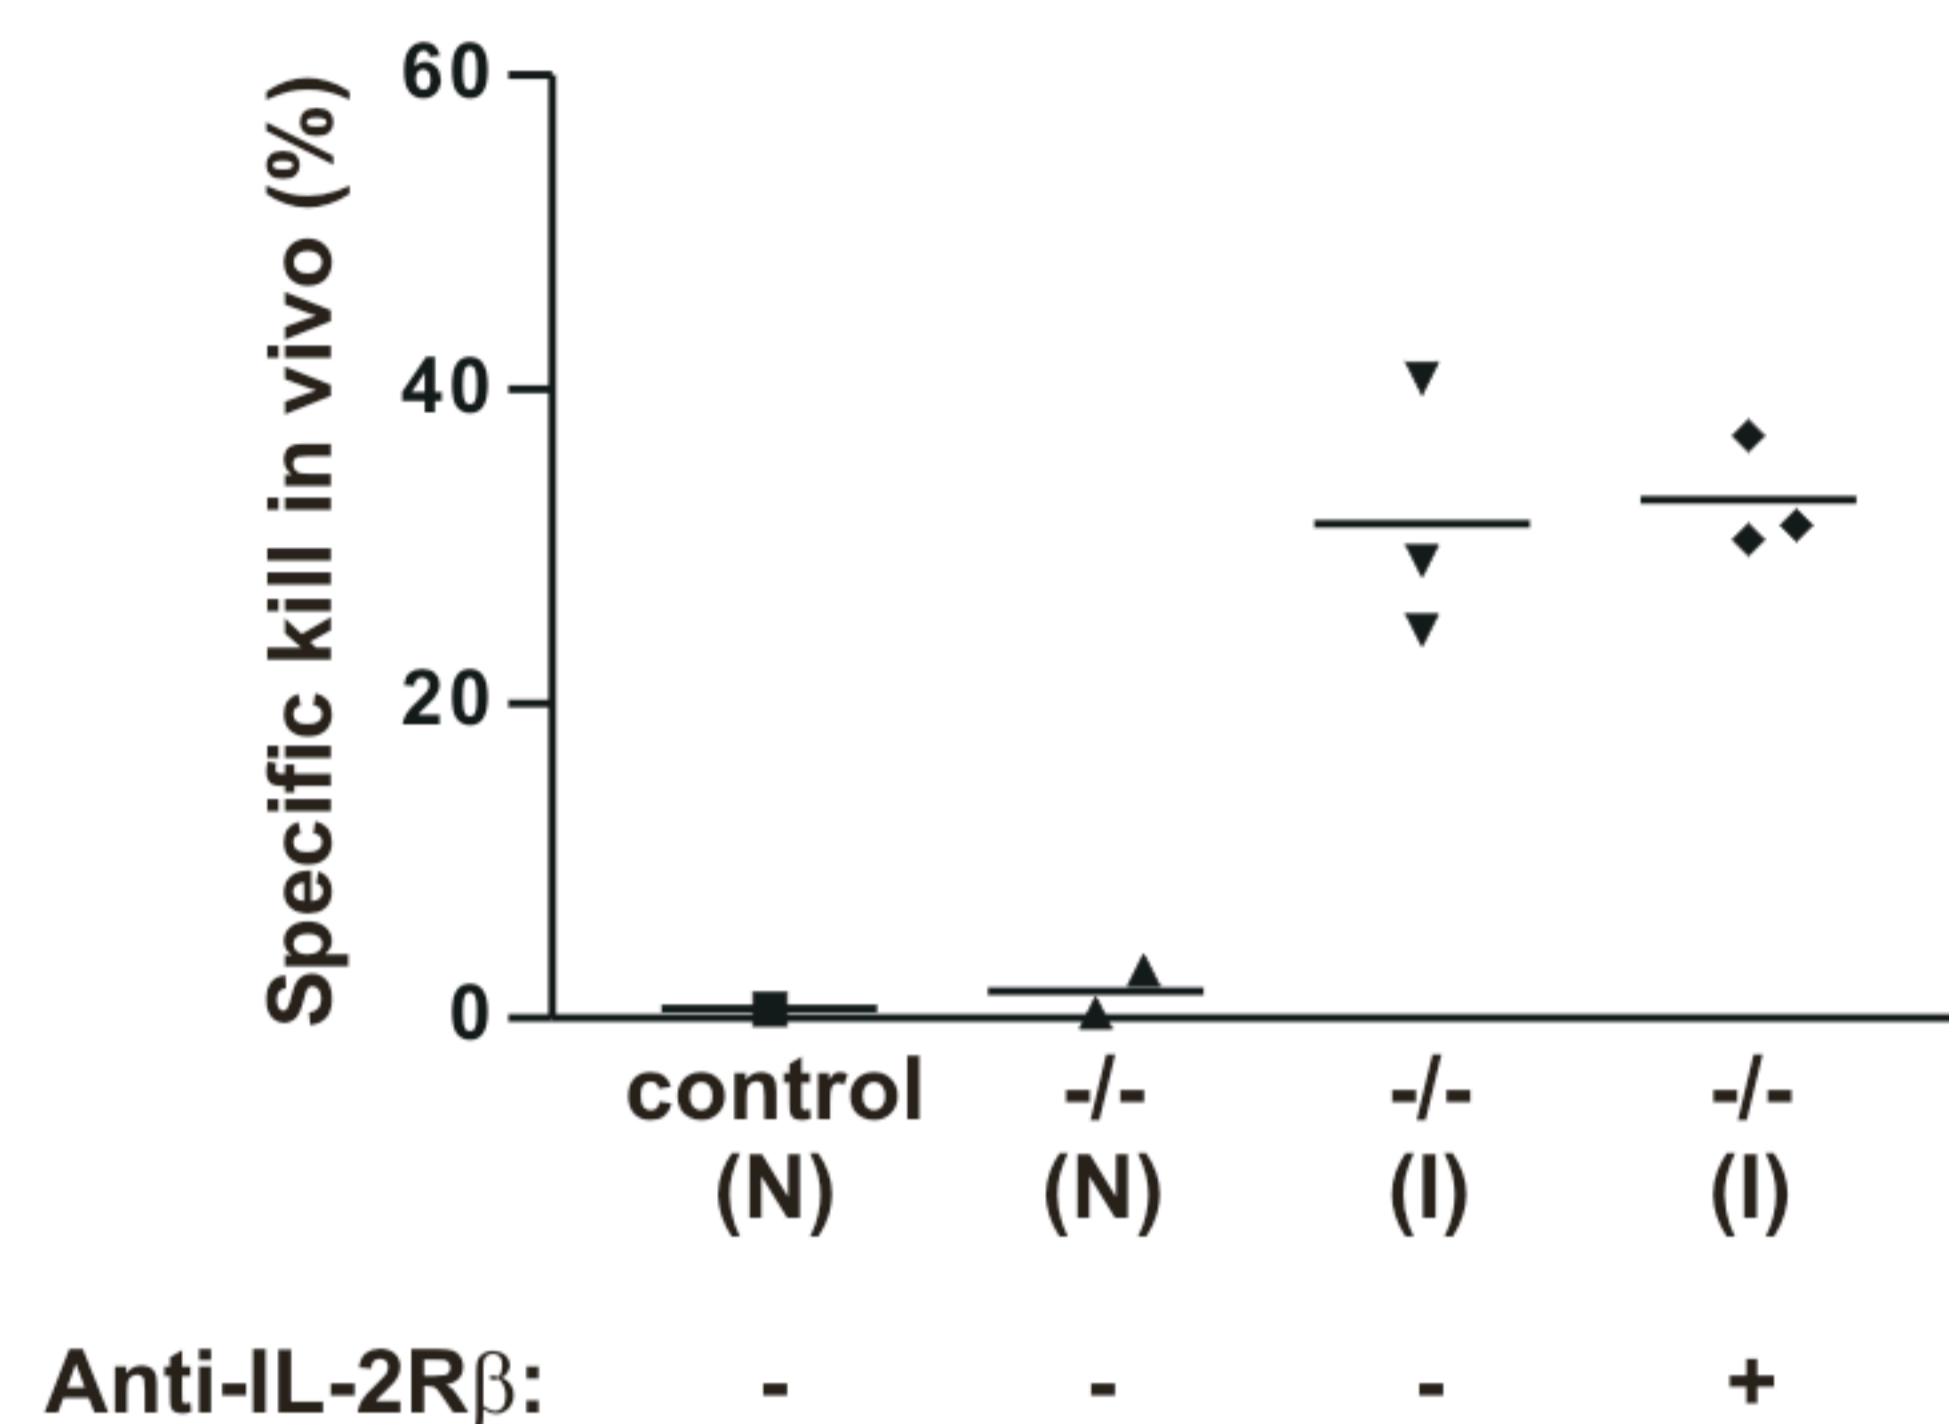

### Figure S3. The rejection of Tag-loaded target cells is NK cell-independent

EBAG9<sup>-/-</sup> mice were immunized by injection (i.p.) of  $2 \times 10^6$  Tag-expressing Co16.113 tumor cells. After 7 d, non-loaded and peptide-loaded spleen cells ( $1 \times 10^7$ ) from naive C57Bl/6 (B6) mice were labeled with different amounts of CFSE and injected (i.v.) into the indicated mice. After 4 h, the ratio between both populations in spleen of recipient mice was determined by flow cytometry. The percentage of specific killing of peptide-loaded cells is indicated, horizontal bars indicate mean values. Where indicated, NK cells were depleted by injection (i.p.) of 300  $\mu$ g anti-IL-2R $\beta$  mAb TM- $\beta$  1 on day three and 200  $\mu$ g on day one prior to performing the killing assay. Depletion of NK cells was confirmed by FACS analysis (data not shown). In average, in untreated mice 4-5% NK cells were found in splenic splenocytes. Antibody-mediated depletion elicited a rate of  $< 0.4\%$  NK cells. Control (N), naive wt mice; -/- (N), naive EBAG9<sup>-/-</sup> mice; -/- (I), immunized EBAG9<sup>-/-</sup> mice.

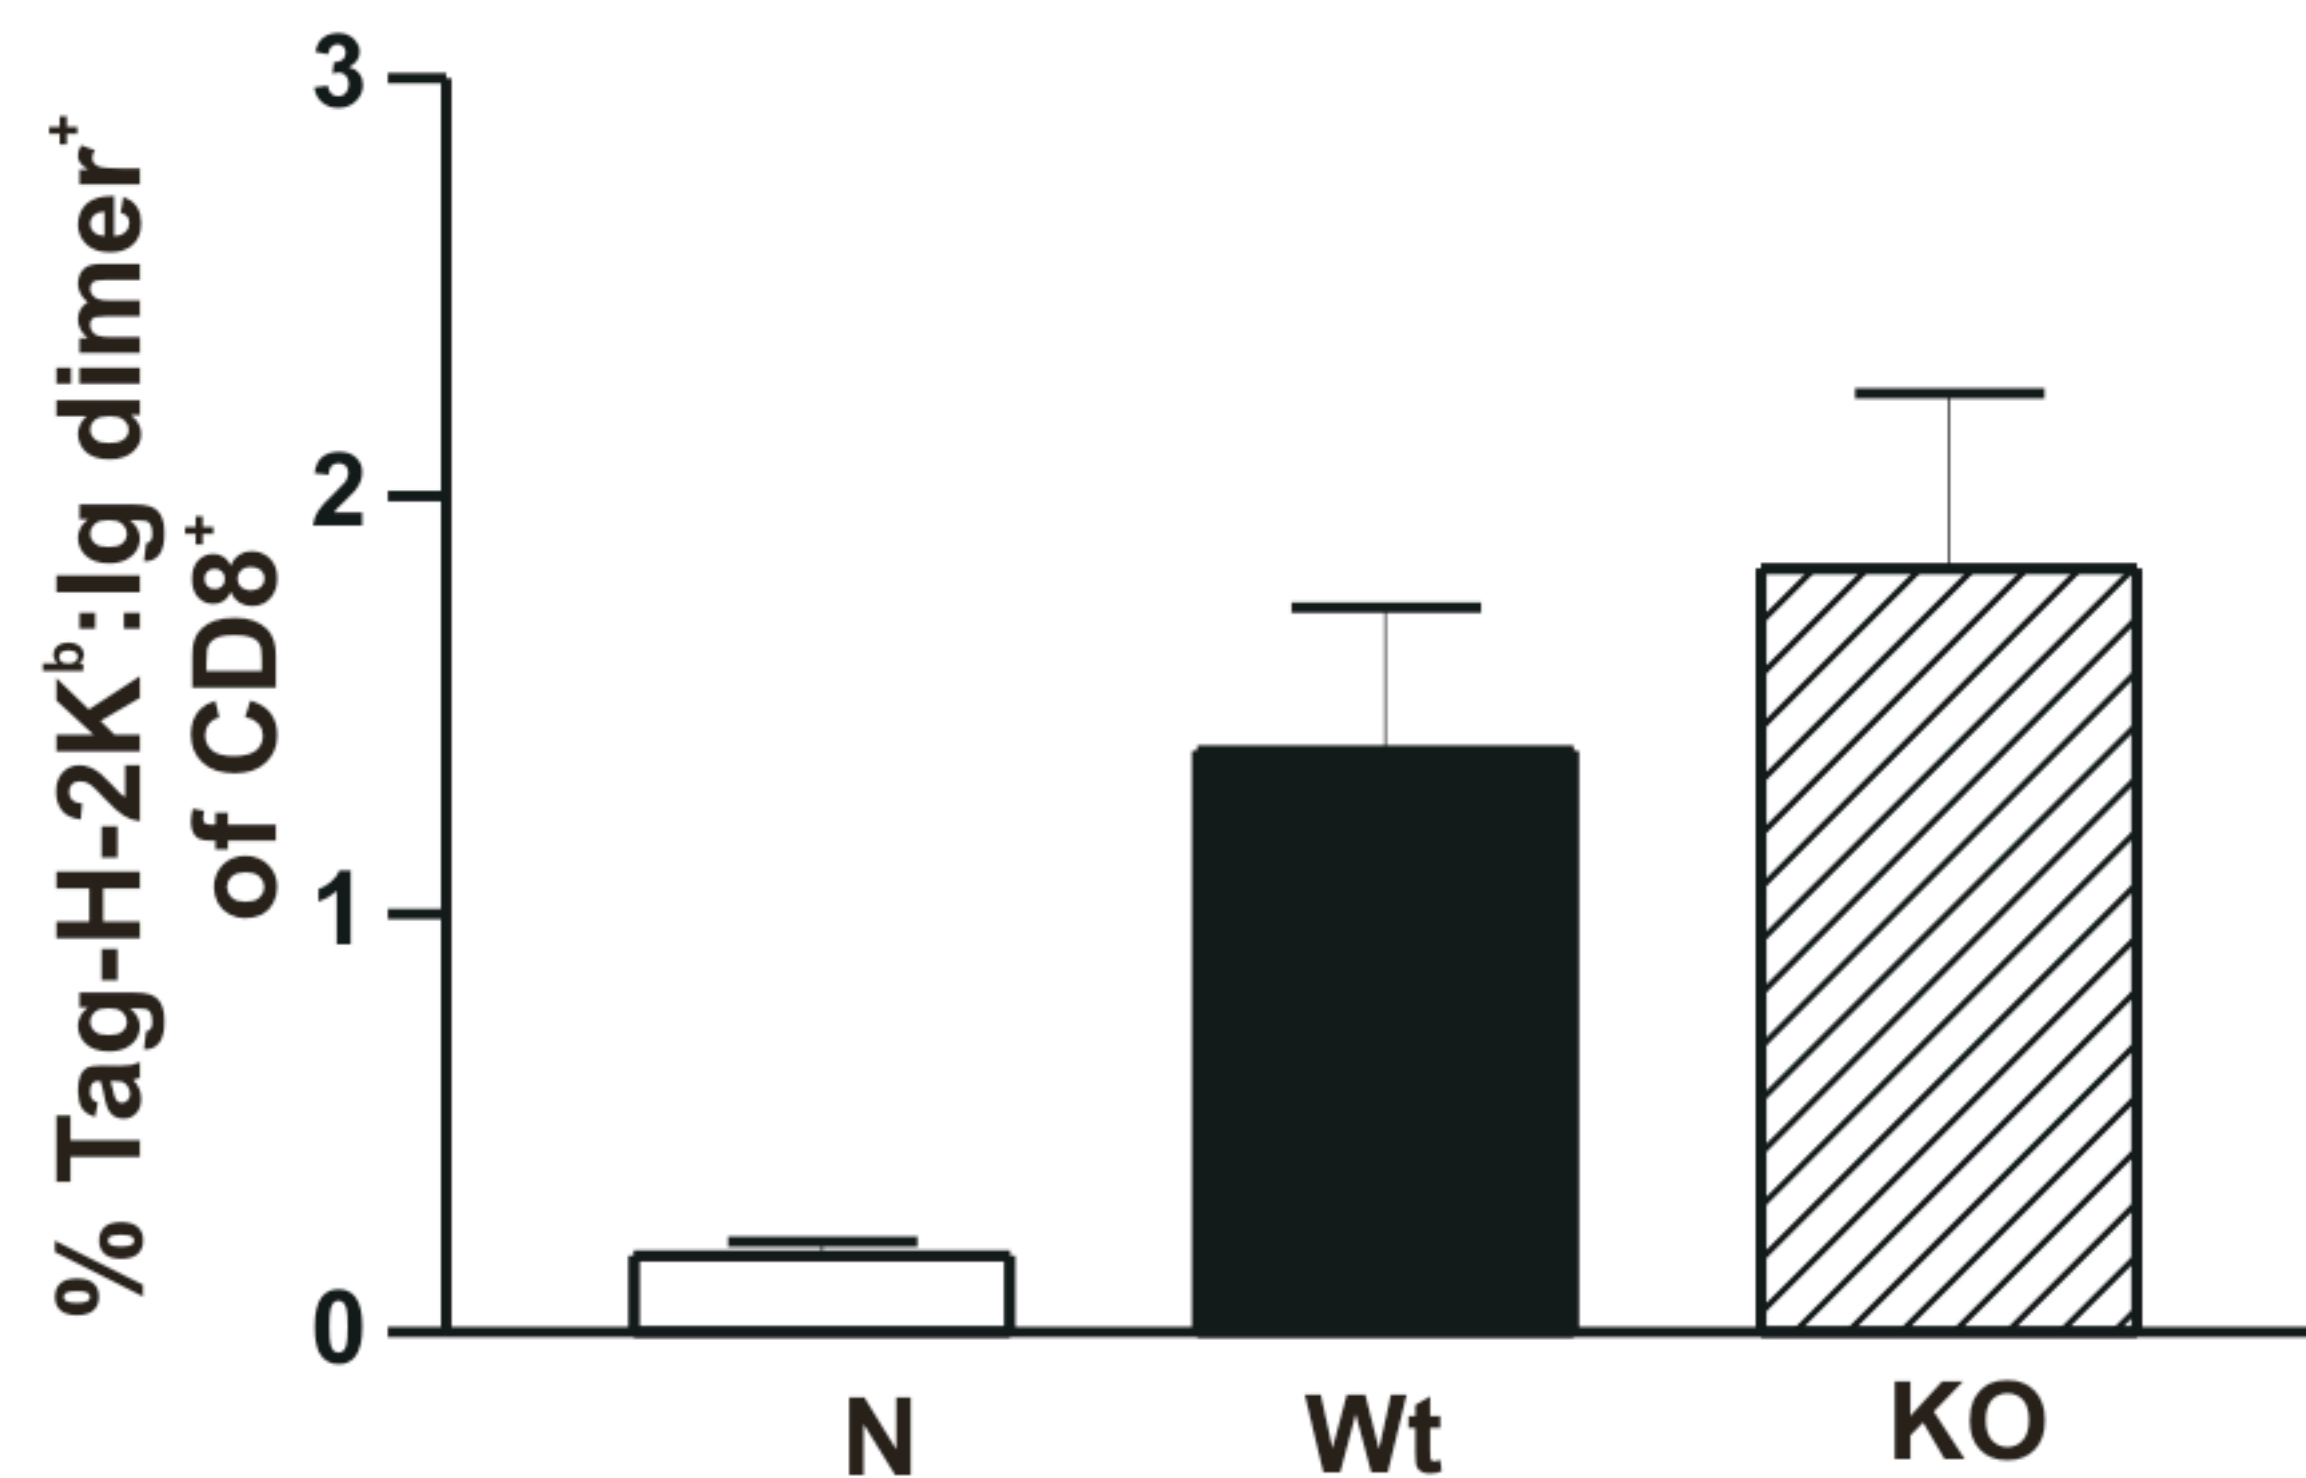

## Figure S4. Frequency of antigen-specific CD8<sup>+</sup> T cells during secondary immune responses

Mice were immunized as described in Figure 3A, followed by a boost after 30 d. At d 6 after rechallenge, splenocytes were stained sequentially with anti-CD8a mAb and H-2K<sup>b</sup>:Ig dimers loaded with Tag-peptide, followed by flow cytometry analysis. N, naive Wt B6 mice. Bars, means  $\pm$  SD of two independent experiments (n=5 for each genotype; no statistically significant difference).

## Supplemental Figure S5

A

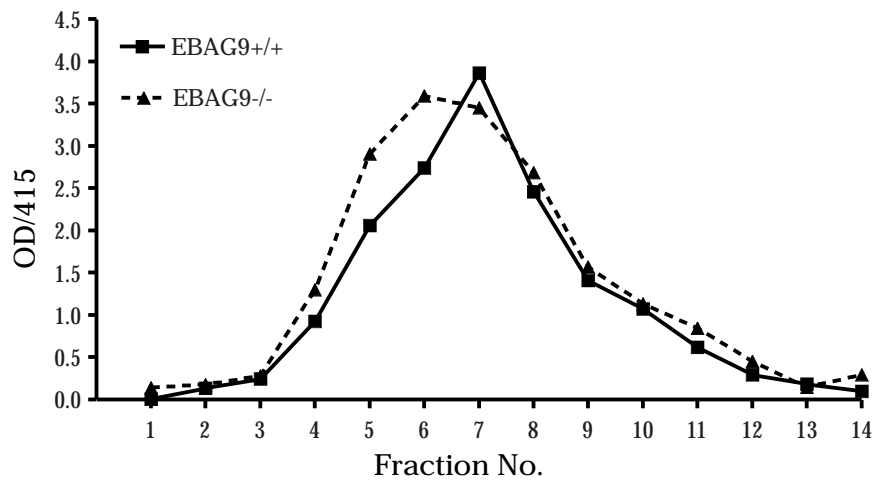

B

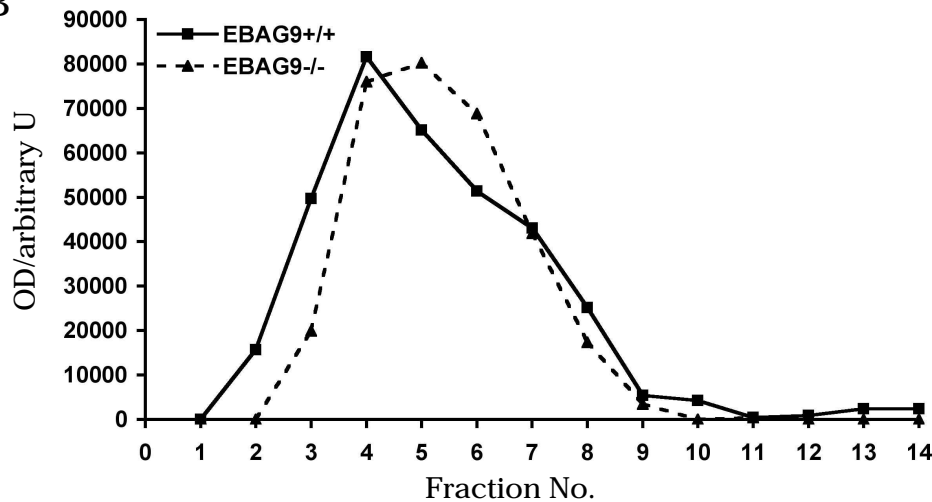

**Figure S5.** Re-distribution of the conventional lysosome marker  $\beta$ -hexosaminidase

A postnuclear supernatant from  $6 \times 10^7$  Wt and EBAG9<sup>-/-</sup> CTL (d6; n=3 mice per genotype) was centrifuged for 50 min to obtain a microsomal pellet. Microsomes were applied on a continuous OptiPrep gradient and subjected to centrifugation as described in Figure 10B. (A) Fractions were taken from the top of each gradient, followed by determination of  $\beta$ -hexosaminidase activity in each gradient fraction using the substrate p-nitrophenyl N-acetyl- $\beta$ -D-glucosaminide (Calbiochem) in 100 mM citrate buffer/0.2% TX-100, essentially as described (Stinchcombe, J.C., et al., 2001. *J. Cell Biol.* 152: 825-834). After addition of 0.1 M carbonate buffer, pH 9.6, absorbance at 415 nm was read. (B) Distribution of the Golgi marker GM130 was determined by immunoblotting, shown is a quantification by densitometric scanning.

## Supplemental Figure 6

A

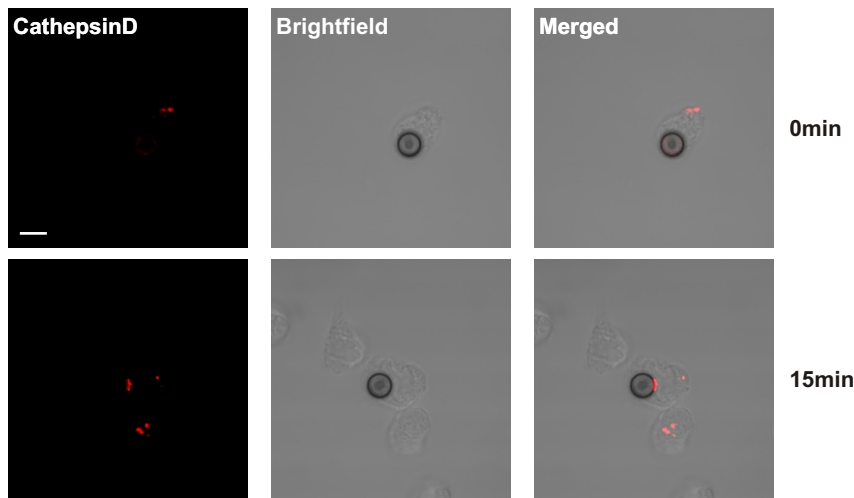

B

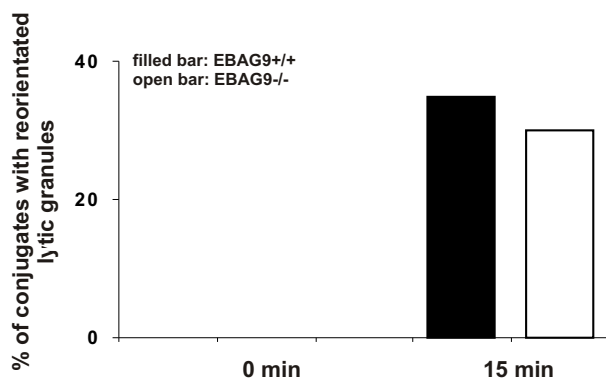

**Figure S6.** Secretory lysosome polarization toward the immunological synapse is indistinguishable between Wt and EBAG9<sup>-/-</sup> CTLs

CTLs were obtained from CD3/CD28 stimulation for 3 d, purified by negative selection with MACS beads, followed by *in vitro* culture for 2-3 d in the presence of IL-2 and IL-7 (50 U/ml). CTLs were mixed in a 1:1 ratio with CD3/CD28 precoated Dynabeads (4.5  $\mu$ m diameter), centrifuged for 5 min, and incubated for another 5 min at 37°C. Conjugates were plated on poly-L-lysine coated coverslips, and incubated for additional 15 min before fixation in acetone and permeabilization. Granules were visualized by intracellular staining with the secretory lysosome marker anti-Cathepsin D. Representative images of KO CTLs are shown. Polarization of Cathepsin D toward the contact site between T cell and microbead was seen exclusively after 15 min of incubation, but not at the 0 min time point. Unconjugated CTLs displayed discrete, punctate staining of intracellular Cathepsin D granules. The percentage of conjugates that displayed focused Cathepsin D is shown. Data are from one experiment with CTLs from n=3 animals per group, with at least 30 conjugates analyzed. Bar 5  $\mu$ m.

## Supplemental Figure 7

**A**

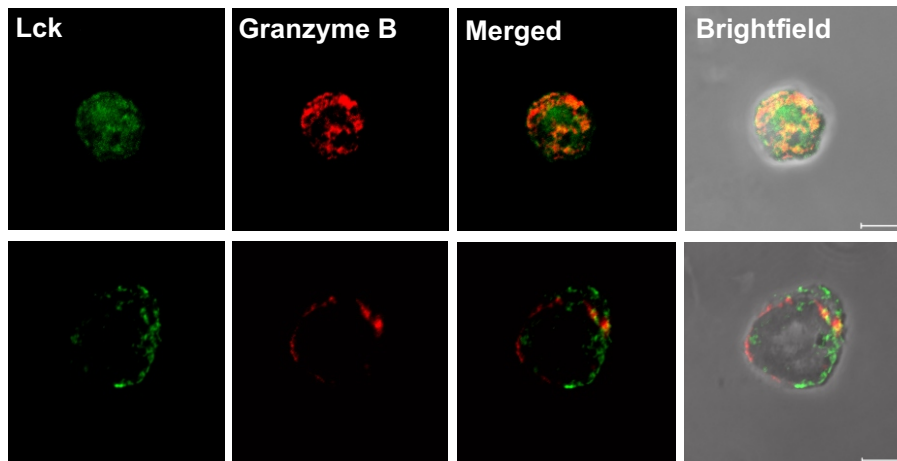

**B**

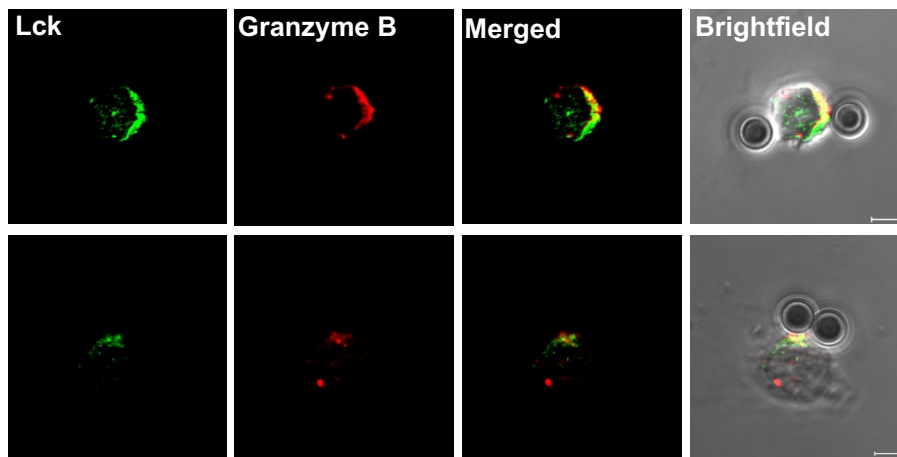

**Figure S7.** Immunological synapse formation is indistinguishable between Wt and EBAG9<sup>-/-</sup> CTLs. CTLs from EBAG9 Wt and KO mice were generated and purified as in Figure S6. CTLs were mixed in a 1:1 ratio with CD3/CD28 precoated Dynabeads, centrifuged for 5 min, and incubated for another 5 min at 37°C. Conjugates were plated on poly-L-lysine coated coverslips, and incubated for additional 15 min before fixation with PFA and permeabilization. Granules were visualized by intracellular staining with the secretory lysosome marker Granzyme B-Alexa Fluor 647, and the signaling zone molecule Lck. Representative images are shown. At the 15 min time point, unconjugated T cells could be easily identified and exhibited a scattered, non-polarized distribution of lytic granules at the cell periphery (A). In T cells conjugated with microbeads, in both genotypes a clearly visible focusing of lytic granules toward the T cell-microbead interface occurred. In this polarized cluster of granules, substantial accumulation of Lck-positive structures was visible (B, Merged images). Data are representative of one experiment with CTLs from n=3 animals per genotype, with at least 20 conjugates analyzed. Polarization was identified in 6 synapses per group. Bar 5 μm.

## Supplemental Figure S8

A

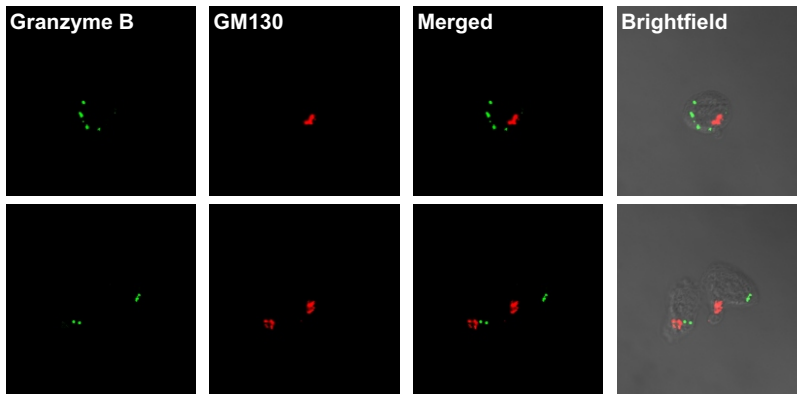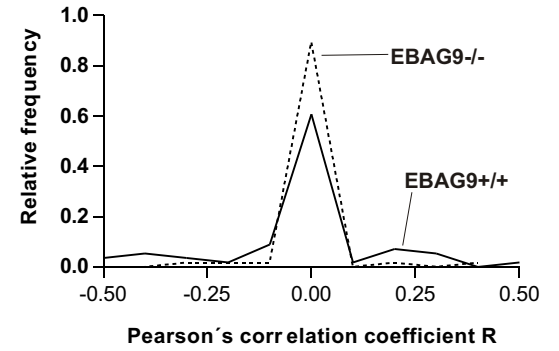

B

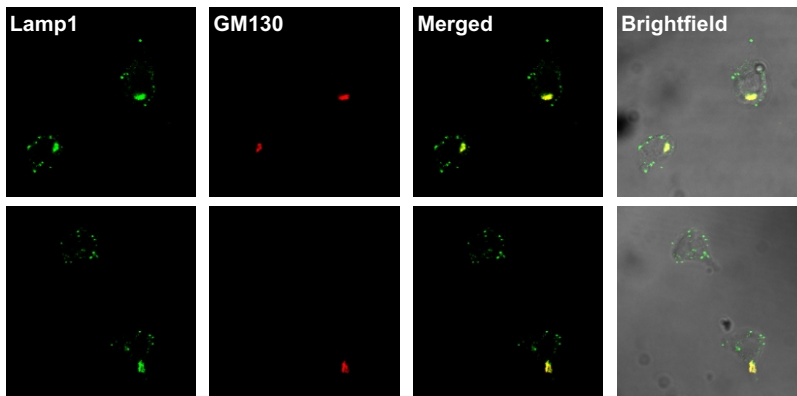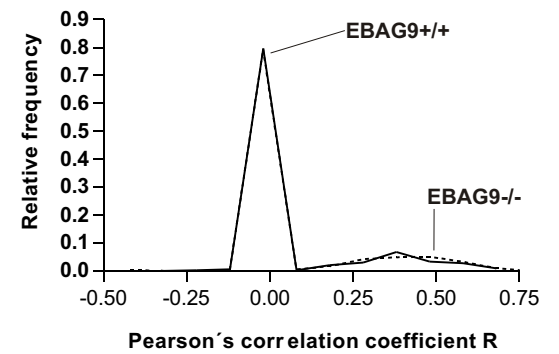

### Figure 8. Subcellular localization of lysosomal compartment markers

(A) Colocalization of Granzyme B with the Golgi marker GM130. EBAG9<sup>+/+</sup>, mean R = -0.026 (n = 56); EBAG9<sup>-/-</sup>, mean R = -0.017 (n = 57); difference between EBAG9<sup>+/+</sup> and EBAG9<sup>-/-</sup> mice was not statistically different (p = 0.774, Student's *t* test).

(B) Colocalization of Lamp1 with GM130. EBAG9<sup>+/+</sup>, mean R = 0.074 (n = 325); EBAG9<sup>-/-</sup>, mean R = 0.082 (n = 436); difference between EBAG9<sup>+/+</sup> and EBAG9<sup>-/-</sup> mice was not statistically different (p = 0.553, Student's *t* test).



## Supplemental Figure S9

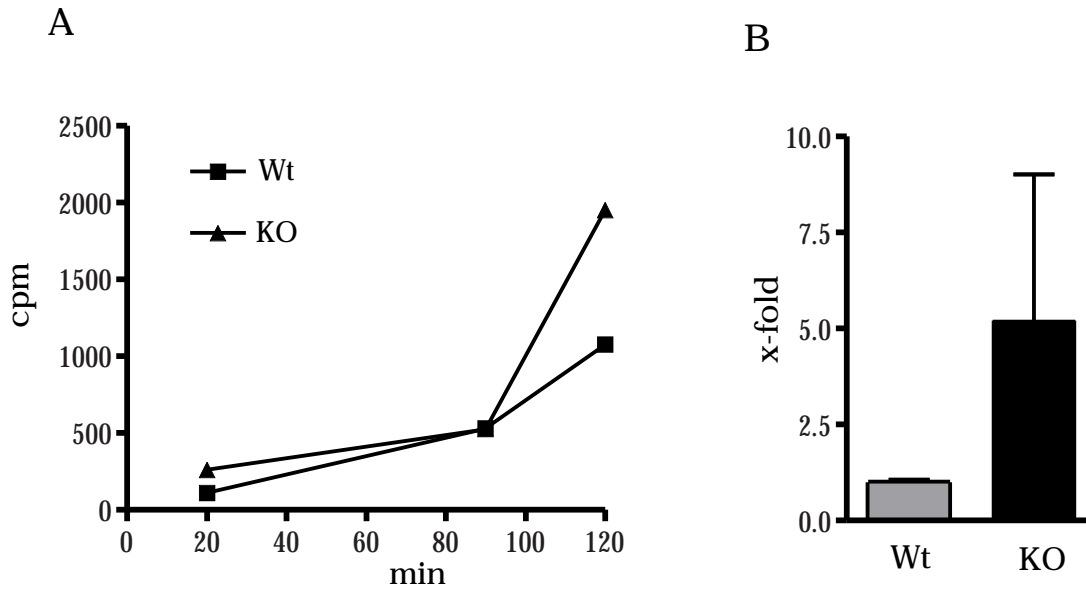

**Figure S9.** Intracellular transport of proteins is enhanced in CTLs from EBAG9-deficient mice

A) CTLs derived from Wt and EBAG9<sup>-/-</sup> mice were pulse-labeled with 500  $\mu$ Ci [<sup>35</sup>S]methionine/cysteine for 5 min, and chased for 20, 90 and 120 min. For the chase period, equal numbers of cells ( $2 \times 10^6$ /well) were transferred onto 6-well plates coated with CD3 and CD28 antibodies (inducible release), or onto untreated plates (constitutive release). At the time points indicated, cell-free supernatant was harvested, and TCA-precipitable radioactivity was determined. Total cell-associated radioactivity at the beginning of the chase period was comparable between genotypes. Regulated release for each time point (t) was calculated according to the formula:

regulated release = cpm (inducible release) - cpm (constitutive release). Data are representative of three experiments performed, with pooled CTL from a total of n=9 mice per genotype.

B) Values obtained according to this formula for the 2h time point from all three experiments were normalized for release in the Wt and set arbitrarily=1. Release is given relative to the rate in Wt cells, data represent mean values, and errors are shown as SEM; difference between Wt and KO CTLs was statistically significant.

**Table S1. Hematopoietic parameters**

| Parameter                               | EBAG9 <sup>+/+</sup> | EBAG9 <sup>-/-</sup> |
|-----------------------------------------|----------------------|----------------------|
| WBC (x 10 <sup>3</sup> /μl)             | 2.46 ± 0.54          | 2.78 ± 1.02          |
| RBC (x 10 <sup>6</sup> /μl)             | 8.65 ± 0.35          | 8.80 ± 0.68          |
| Hemoglobin (g/dl)                       | 14.3 ± 0.5           | 14.8 ± 0.6           |
| Hematocrit (%)                          | 44.8 ± 2.1           | 44.8 ± 3.2           |
| Platelet (x 10 <sup>3</sup> /μl)        | 965 ± 138            | 935 ± 101            |
| % lymphocytes                           | 82.1 ± 3.0           | 85.6 ± 2.5           |
| % monocytes                             | 5.74 ± 0.89          | 5.00 ± 0.72          |
| % granulocytes                          | 12.1 ± 2.3           | 9.42 ± 2.0           |
| % Ter119 <sup>+</sup> CD71 <sup>+</sup> | 17.6 ± 1.44          | 17.7 ± 1.3           |

Data shown are mean ± S.D. White blood cells (WBC), red blood cells (RBC), and other parameters in 8- to 12-week-old mice (EBAG9<sup>+/+</sup>, n = 14; EBAG9<sup>-/-</sup>, n = 15). Percent erythroid precursor (Ter119<sup>+</sup>CD71<sup>+</sup>) in bone marrow was determined by flow cytometry.

**Table S2. Lymphocyte subpopulations in secondary lymphoid organs**

| Parameter           | EBAG9 <sup>+/+</sup> | EBAG9 <sup>-/-</sup> | p value |
|---------------------|----------------------|----------------------|---------|
| <b>Spleen</b>       |                      |                      |         |
| % B220 <sup>+</sup> | 49.6 ± 5.4           | 49.5 ± 4.6           | n.s.    |
| % CD3 <sup>+</sup>  | 35.4 ± 4             | 35.7 ± 4.3           | n.s.    |
| % CD4 <sup>+</sup>  | 20.3 ± 2.3           | 21.3 ± 2.1           | n.s.    |
| % CD8 <sup>+</sup>  | 14.3 ± 2             | 13.7 ± 1.3           | n.s.    |
| <b>Lymph node</b>   |                      |                      |         |
| % B220 <sup>+</sup> | 37.4 ± 3.7           | 38.8 ± 7.3           | n.s.    |
| % CD3 <sup>+</sup>  | 60.3 ± 3.9           | 58.4 ± 7.4           | n.s.    |
| % CD4 <sup>+</sup>  | 36 ± 2.7             | 33.3 ± 6.6           | n.s.    |
| % CD8 <sup>+</sup>  | 23.4 ± 2.2           | 21 ± 3.4             | n.s.    |

Data shown are mean ± S.D. (n=9) and were obtained by flow cytometry.
